# Supplementary material for: Conductivity, Surface Tension, and Comparative Antibacterial Efficacy Study of Different Brands of Soaps of Nepal
Source: Hindawi journal article supplement (doi:10.1155/2020/6989312), 2020-04-15
Supplement: f1 [file 6989312.f1.pdf]

## Supplementary Information

**S1 Table. Ingredients of various soaps selected for antibacterial assessment**

| Brand             | Composition(As provided in cover)                                                                                                                                                                                                                                                                                                                                                                                                                                                                                                          |
|-------------------|--------------------------------------------------------------------------------------------------------------------------------------------------------------------------------------------------------------------------------------------------------------------------------------------------------------------------------------------------------------------------------------------------------------------------------------------------------------------------------------------------------------------------------------------|
| Lifebuoy (LFBY)   | SodiumPalmatee, sodium palm kernelate, water, talc, glycerin, perfume, Sodium C14-18 olefin sulfonate, sodium chloride, lauric acid, VP/VA copolymer, tetrasodium etidronate, pentasodiumpentetate, triclocarban, sodium carbonate, tetrasodium EDTA, silver oxide, CI 12490, CI 11680, thymol, terpineol,methylchloroisothiazolinone and methylisothiazolinone.                                                                                                                                                                           |
| Lux (LX)          | SodiumPalmatee, sodium palm kernelate, water, talc, glycerin, perfume, sodium chloride, titanium dioxide, lauric acid, PEG-8,Polysorbatee 20,tetrasodium etidronate, milk lipid,tetrasodium EDTAA, disodiumdistyrylbiphenyldisulfonate, sericin, rosa gallica flower extract, jasmine flower extract, prunus amygdalusdulcis oil, nelumbiumspeciosum flower oil, mentha arvensis leaf oil, cymbopogon martini oil, PEG-40 hydrogenated castor oil, alpha-isomethyl ionone, benzyl salicylate, coumarin, eugenol, hexyl cinnamal, linalool. |
| Liril (LRL)       | Sodium palamate, sodium palm kernelate, water, talc, glycerin, sorbitol, perfume, sodium chloride, titanium dioxide, tetrasodium etidronate, tetrasodium EDTA, lime extract, CI 74260, CI 11680, Methylchloroisothiazolinone and methylisothiazolinone.                                                                                                                                                                                                                                                                                    |
| Okhati (OKT)      | Aloe vera, amala, Neem, chiuree, tulsi, titepati, coconut oil, castor oil, glycerin,essential oil, etc.                                                                                                                                                                                                                                                                                                                                                                                                                                    |
| Chiuree Neem (NM) | Neem, chiuree, rose, lemon, almonds, glycerin, olive oil, coconut oil, honey, castor oil, peppermin, and other natural herbs.                                                                                                                                                                                                                                                                                                                                                                                                              |
